# Supplementary material for: Oncolytic adenovirus encoding LHPP exerts potent antitumor effect in lung cancer
Source: Springer Nature journal article supplement (doi:10.1038/s41598-024-63325-z), 2024-06-07
Supplement: MOESM2 [file 41598_2024_63325_MOESM2_ESM.pdf]

Supplementary Figure Original images of Western blot

Figure 2b CAR

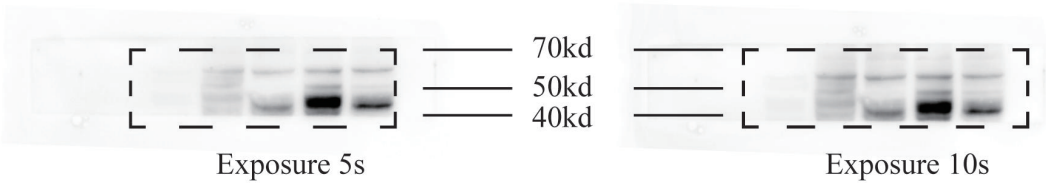

Figure 2b GAPDH

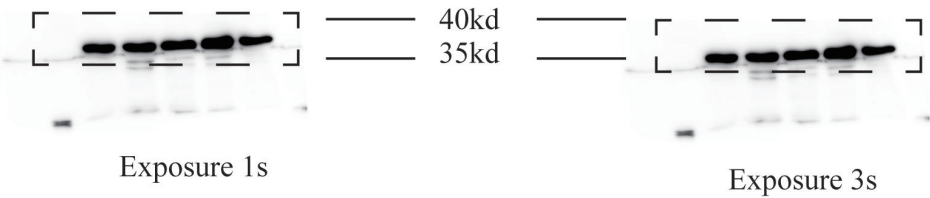

Figure 2d LHPP

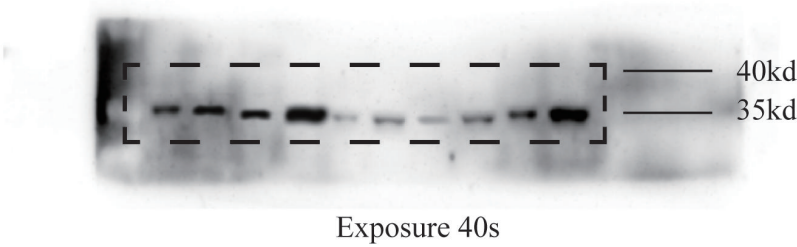

Figure 2d E1A

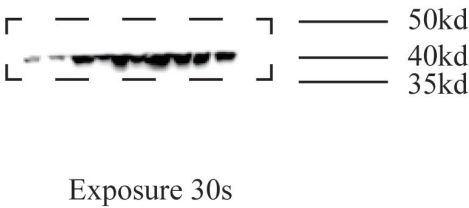

Figure 2d GAPDH

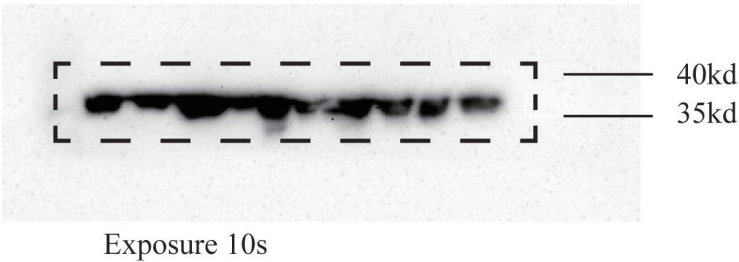

Figure 4c Caspase 3

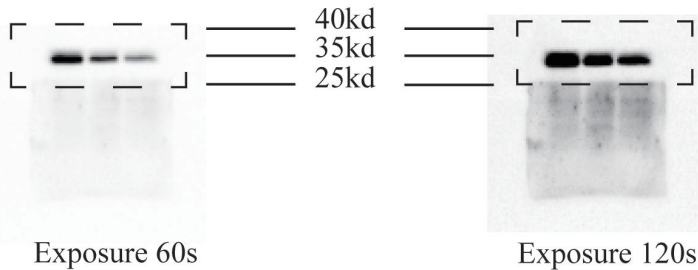

Figure 4c Cleaved-Caspase 3

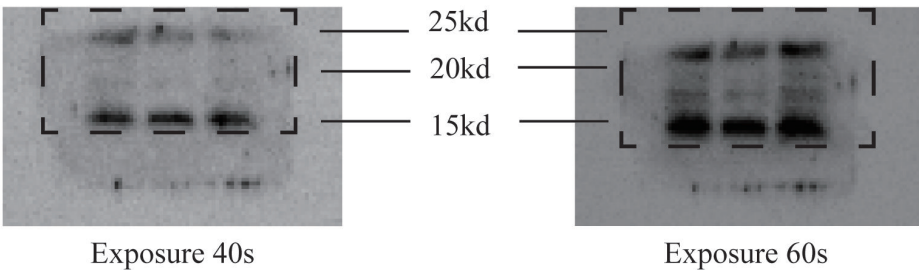

Figure 4c BAX

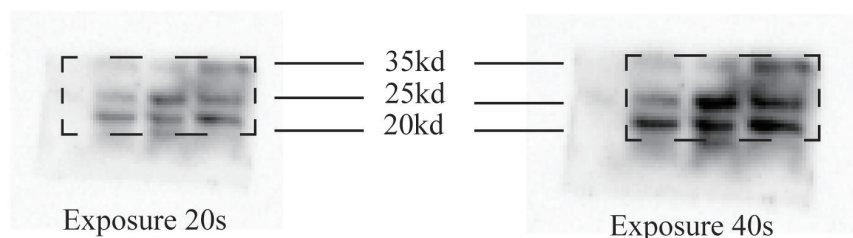

Figure 4c p62

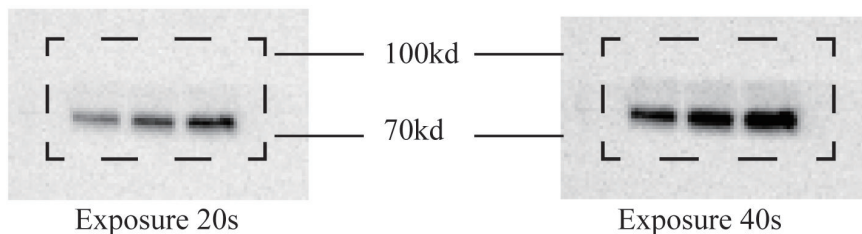

Figure 4c LC3A/LC3B

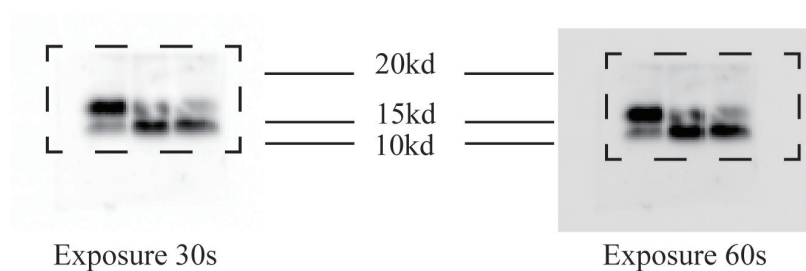

Figure 4c LHPP

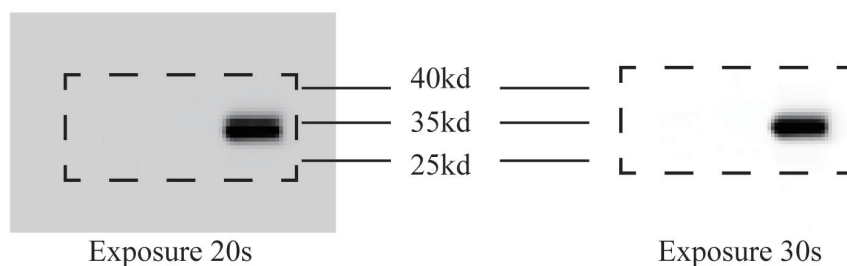

Figure 4c GAPDH

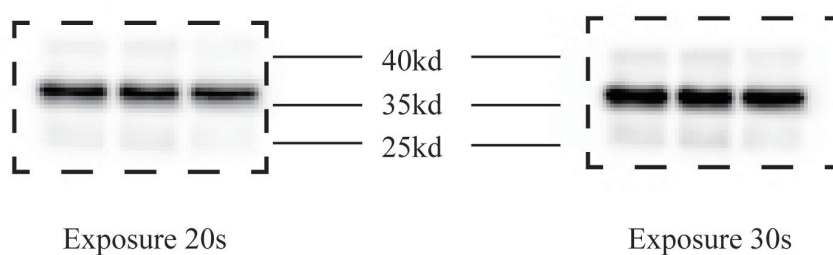

These original images from the blots used in our manuscript were scanned with a fully automated chemiluminescence image analyser, which was automatically exposed, and we didn't obtain multiple exposure images. Please understand.
